# Supplementary material
Source: PubMed Central journal article supplement (PMC5691412)
Supplement: AEM.01523-17_zam999118170s1.pdf [file AEM.01523-17_zam999118170s1.pdf]

## Supplemental Material

### Co-administration of the *Campylobacter jejuni* N-glycan based vaccine with probiotics improves vaccine performance in broiler chickens

H. Nothhaft<sup>1^</sup>, M.E. Perez-Muñoz<sup>2#</sup>, G.J. Gouveia<sup>3,4#</sup>, R.M. Duar<sup>2</sup>, J.J. Wanford<sup>5</sup>, L. Lango-Scholey<sup>5</sup>, C. G. Panagos<sup>4</sup>, V. Srithayakumar<sup>2,6</sup>, G.S. Plastow<sup>2,6</sup>, C. Coros<sup>7</sup>, C.D. Bayliss<sup>5</sup>, A. S. Edison<sup>3,4</sup>, J. Walter<sup>1,2</sup> and C.M. Szymanski<sup>1,4,8,^</sup>

FIG S1

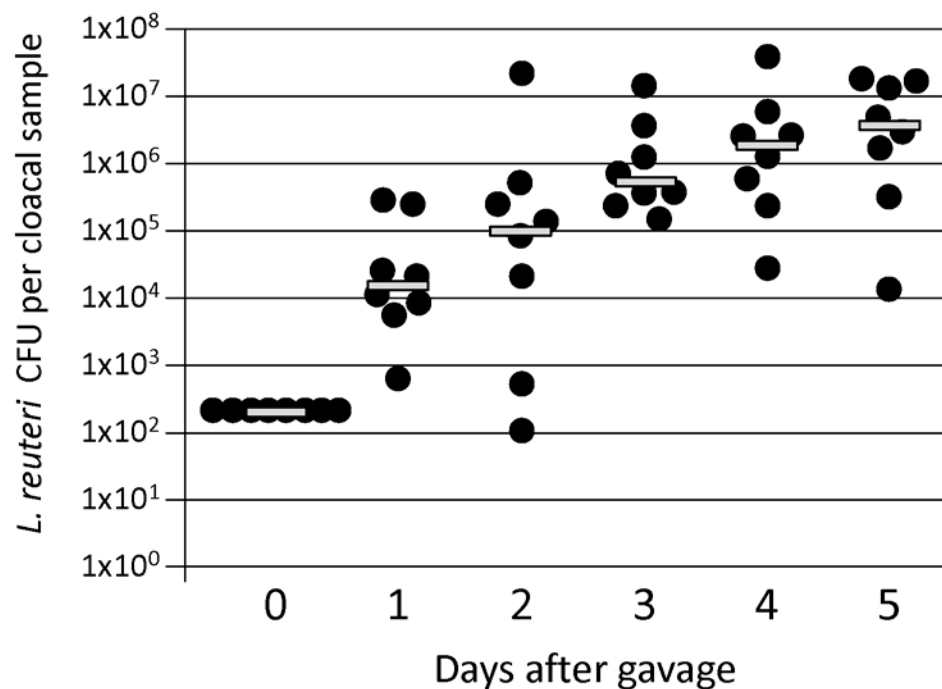

**FIG S1 Cloacal swab cell counts on *L. reuteri* isolation medium.** Cloacal swabs were collected at day 0 and from days 1 - 5 thereafter from SPF ex-*Lactobacillus*-free leghorn chickens (n= 8) that were gavaged with nine different poultry isolates of *L. reuteri* (S1 Table). Each data point represents a sample from an individual bird; grey bars represent the median for each group.

FIG S2

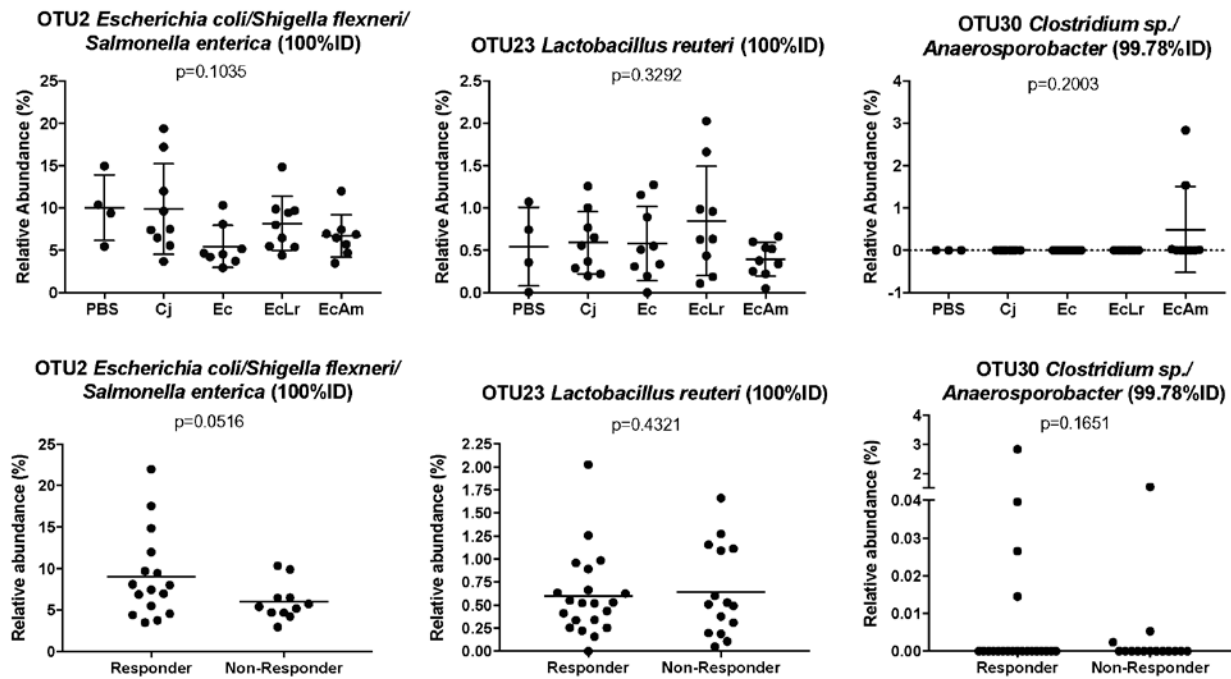

FIG S2 Relative abundance of bacteria of interest for all treatments and for responders and non-responders. Statistics: Grubbs' test for removal of outliers followed by One-way ANOVA with Benjamini and Hochberg FDR correction.

FIG S3

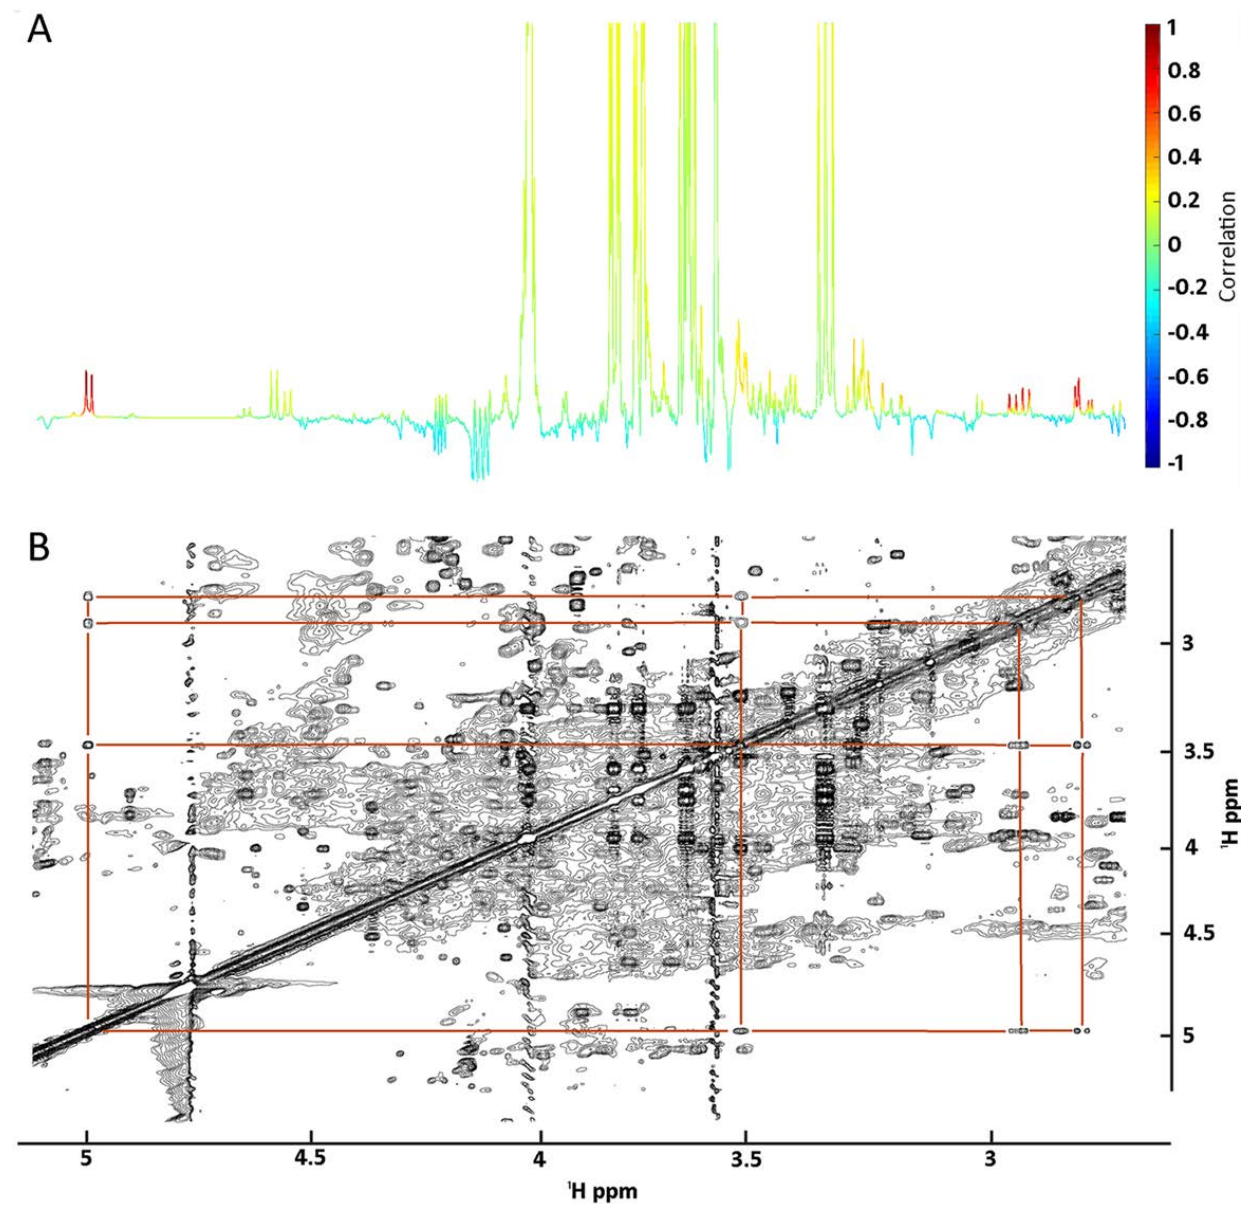

**FIG S3 Correlations to the driver peak at 5 ppm.** (A) STOCY output displaying correlation as color and covariance as peak height. Red peaks at 2.7 and 2.9 ppm indicate high correlation to the driver peak at 5 ppm. (B) TOCSY experiment shows the lines connecting the correlating the red colored peaks, consistent with the STOCY and an additional peak at 3.5 ppm.

**TABLE S1. Strains used in *in vivo* probiotic selection experiments**

| <b>Strain</b> | <b>Host of Isolation<sup>(1)</sup></b> | <b><i>leuS</i> allele number<sup>(1)</sup></b> |
|---------------|----------------------------------------|------------------------------------------------|
| CSF8          | chicken                                | 15                                             |
| 1366          | chicken                                | 6                                              |
| JCM1081       | chicken                                | 24                                             |
| 11283         | chicken                                | 5                                              |
| T2            | turkey                                 | 11                                             |
| tu160         | turkey                                 | 38                                             |
| lk150         | chicken                                | 29                                             |
| hwh3          | chicken                                | 22                                             |
| nck983        | chicken                                | 36                                             |

**Reference:**

1. **Oh PL, Benson AK, Peterson DA, Patil PB, Moriyama EN, Roos S, Walter J.** 2010. Diversification of the gut symbiont *Lactobacillus reuteri* as a result of host-driven evolution. *ISME J* **4**:377-387.

**TABLE S2. Weight gain in broilers (raw data for Fig 2D)**

| Group | Bird | Weight (in grams) |        |        |
|-------|------|-------------------|--------|--------|
|       |      | Day 8             | Day 31 | Day 35 |
| PBS   | 1-1  | 222.4             | 1369   | 1669   |
|       | 1-2  | 208.7             | 1262   | 1552   |
|       | 1-3  | 211.3             | 1194   | 1456   |
|       | 1-4  | 198.7             | 1392   | 1748   |
| Cj    | 2-1  | 202.5             | 1230   | 1507   |
|       | 2-2  | 175.5             | 1253   | 1542   |
|       | 2-3  | 205.5             | 1391   | 1623   |
|       | 2-4  | 190               | 1085   | 1309   |
|       | 2-5  | 237.7             | 1316   | 1501   |
|       | 2-6  | 193.4             | 1316   | 1620   |
|       | 2-7  | 200.8             | 1213   | 1503   |
|       | 2-8  | 170.7             | 1374   | 1699   |
|       | 2-9  | 211.8             | 1298   | 1540   |
| Ec    | 3-1  | 193.7             | 1252   | 1603   |
|       | 3-2  | 184.7             | 1120   | 1547   |
|       | 3-3  | 200.2             | 1273   | 1526   |
|       | 3-4  | 178.5             | 1257   | 1399   |
|       | 3-5  | 151.5             | 1176   | 1494   |
|       | 3-6  | 204.5             | 1346   | 1535   |
|       | 3-7  | 211.5             | 994    | 1200   |
|       | 3-8  | 201.2             | 1423   | 1733   |
|       | 3-9  | 199.5             | 1125   | 1412   |
| EcLr  | 4-1  | 163.8             | 1351   | 1653   |
|       | 4-2  | 168.2             | 1275   | 1544   |
|       | 4-3  | 154.1             | 1396   | 1588   |
|       | 4-4  | 165.4             | 1315   | 1652   |
|       | 4-5  | 176.2             | 1338   | 1609   |
|       | 4-6  | 180.1             | 1358   | 1694   |
|       | 4-7  | 192.5             | 1395   | 1665   |
|       | 4-8  | 178.1             | 1407   | 1752   |
|       | 4-9  | 158.9             | 1238   | 1553   |
| EcAm  | 5-1  | 203.7             | 1348   | 1635   |
|       | 5-2  | 110.9             | 1204   | 1490   |
|       | 5-3  | 174.1             | 1285   | 1549   |
|       | 5-4  | 176.4             | 1361   | 1638   |
|       | 5-5  | 193.2             | 1303   | 1590   |
|       | 5-6  | 203.4             | 1461   | 1596   |
|       | 5-7  | 174.5             | 1186   | 1477   |
|       | 5-8  | 181.9             | 1340   | 1632   |
|       | 5-9  | 200.3             | 1430   | 1721   |

**TABLE S3. Multiplex Primer Mix**

| Multiplex Primer Mix | Locus (81-176) | Expected Peak Size | Control Peak Size | Tract Length (Genome) | Label | Colour |
|----------------------|----------------|--------------------|-------------------|-----------------------|-------|--------|
| <b>MIX A</b>         | 0082           | 313                | 312.6             | G9                    | FAM   | B      |
|                      | 0590           | 353                | 352.3             | G10                   | FAM   | B      |
|                      | 1325           | 253                | 250.1             | G9                    | FAM   | B      |
|                      | 1419           | 186                | 181.5             | G9                    | FAM   | B      |
|                      | 1429           | 469                | 467               | G10                   | FAM   | B      |
| <b>MIX B</b>         | 0086           | 155                | 152.8             | G9                    | FAM   | B      |
|                      | 0708           | 130                | 126.5             | G9                    | FAM   | B      |
|                      | 0758           | 224                | 223.8             | G9                    | FAM   | B      |
|                      | 1160           | 288                | 283.2             | G10                   | FAM   | B      |
|                      | 1341           | 392                | 389.6             | G9                    | FAM   | B      |
| <b>MIX C</b>         | 0646           | 167                | 166.2             | G9                    | VIC   | G      |
|                      | 1312           | 161                | 157.8             | G9                    | NED   | Y      |
|                      | 1321           | 291                | 290               | G9                    | VIC   | G      |
|                      | 1421           | 262                | 257.8             | G10                   | VIC   | G      |
|                      | 1432           | 342                | 339.6             | G10                   | VIC   | G      |
| <b>MIX D</b>         | 0206           | 287                | 284.2             | G9                    | NED   | Y      |
|                      | 0765           | 197                | 194.7             | C11                   | NED   | Y      |
|                      | 1327           | 233                | 232.3             | G9                    | VIC   | G      |
|                      | 1435           | 321                | 315.6             | G9                    | NED   | Y      |

**TABLE S4. Distribution of five gene phasotypes between control and vaccinated challenge groups**

|            | Phasotype Groups for a Five Gene Phasotype<br>(0086-1160-1312-1419-1421) <sup>§</sup> |                                                              |                                                                                             |
|------------|---------------------------------------------------------------------------------------|--------------------------------------------------------------|---------------------------------------------------------------------------------------------|
|            | Phasogroup 1*                                                                         | Phasogroup 2*                                                | Phasogroup 3*                                                                               |
| Phasotypes | <b>10010, 10100,</b><br>10000, 10001,<br><b>00100, 01010, 00010</b>                   | 00101, 00011,<br><b>00111, 00110,</b><br><b>01100, 10110</b> | <b>01110, 01111,</b><br>10111, <b>01101,</b><br>10101, <b>11101,</b><br>11100, 11110, 11111 |
| Gavage     | 33%                                                                                   | 33%                                                          | 33%                                                                                         |
| Control    | 27%                                                                                   | 12%                                                          | 62%                                                                                         |
| Group 3    | 34%                                                                                   | 41%                                                          | 25%                                                                                         |
| Group 4    | 31%                                                                                   | 67%                                                          | 1%                                                                                          |
| Group 5    | 35%                                                                                   | 32%                                                          | 32%                                                                                         |
| Group 6    | 34%                                                                                   | 14%                                                          | 53%                                                                                         |

\*Phasotypes in bold were present within the gavage; <sup>§</sup>Numbers in the brackets are the gene numbers for strain 81-176 without the gene prefix CJJ81176.

The five gene phasotypes for five phase-variable genes of the challenge strain (81-176) were evaluated for 24-30 colonies per sample (gavage or caecal contents). The total numbers of colonies analysed were: gavage, 24; Cj, 259 (from nine birds); Ec, 134 (from five birds); EcLr, 89 (from three birds); EcAm, 77, (from three birds).

Phasotypes were arbitrarily distributed into three phasogroups based on the two criteria – numbers of genes expressed and requirement for one switching event between at least one other member of the group. Phasogroup 1 contains phasotypes with one or two expressed genes; phasogroup 2, two or three expressed genes; phasogroup 3, three to five expressed genes. Phasogroup 1 exhibited a similar proportion in isolates from gavage, control and vaccinated birds. Phasogroups 2 and 3 exhibited proportions similar to the gavage while the control exhibited a bias for phasogroup 3 in output colonies.

**TABLE S5. Multivariate analysis (PCA and PLS-DA) parameters, list of PCs for PCA (totalling 80% of the variance) and PLS-DA and, classification and fit measurements  $Q^2$  and  $R^2$**

| <b>Statistical Method</b>                             | <b>Algorithm</b> | <b>Cross-Validation</b>        | <b>Principal Components</b> | <b>% Variance</b> | <b><math>R^2</math></b> | <b><math>Q^2</math></b> |
|-------------------------------------------------------|------------------|--------------------------------|-----------------------------|-------------------|-------------------------|-------------------------|
| PCA                                                   | Nipals           | N/A                            | <b>PC1</b>                  | 25.22             | N/A                     | N/A                     |
|                                                       |                  |                                | <b>PC2</b>                  | 14.30             | N/A                     | N/A                     |
|                                                       |                  |                                | <b>PC3</b>                  | 13.02             | N/A                     | N/A                     |
|                                                       |                  |                                | <b>PC4</b>                  | 8.37              | N/A                     | N/A                     |
|                                                       |                  |                                | <b>PC5</b>                  | 6.86              | N/A                     | N/A                     |
|                                                       |                  |                                | <b>PC6</b>                  | 4.70              | N/A                     | N/A                     |
|                                                       |                  |                                | <b>PC7</b>                  | 3.20              | N/A                     | N/A                     |
|                                                       |                  |                                | <b>PC8</b>                  | 2.96              | N/A                     | N/A                     |
|                                                       |                  |                                | <b>PC9</b>                  | 2.20              | N/A                     | N/A                     |
| PLS-DA<br>(30<br>Permutations<br>and 5<br>components) | SIMPLS           | n-fold<br>cross-<br>validation | <b>PC1</b>                  | 12.85             | 0.6023                  | 0.2700                  |
|                                                       |                  |                                | <b>PC2</b>                  | 6.15              | 0.7486                  | 0.2366                  |
|                                                       |                  |                                | <b>PC3</b>                  | 6.98              | 0.8203                  | 0.1989                  |



**TABLE S6. Metabolite database matching using COLMARm and ASSURE NMR**

| <b>Compound name</b>        | <b>COLMARm</b>        |                   | <b>Confidence Index</b> |
|-----------------------------|-----------------------|-------------------|-------------------------|
|                             | <b>Matching ratio</b> | <b>Uniqueness</b> |                         |
| L-Tryptophan                | 0.75                  | 6/6               | 4                       |
| L-Isoleucine                | 0.67                  | 4/4               | 4                       |
| D-Pinitol                   | 1                     | 4/7               | 4                       |
| Alanine                     | 1                     | 4/4               | 4                       |
| Nicotinic acid              | 1                     | 4/4               | 4                       |
| N-Acetyl-D-glucosamine      | 1                     | 3/7               | 4                       |
| L-Threonine                 | 1                     | 3/3               | 4                       |
| L-Valine                    | 1                     | 3/4               | 4                       |
| Myo-inositol                | 1                     | 3/4               | 4                       |
| 6-Phosphogluconic acid      | 0.8                   | 3/4               | 4                       |
| L-Threonine                 | 1                     | 3/3               | 4                       |
| L-Glutamic acid             | 1                     | 2/3               | 4                       |
| 5-Aminopentanoic acid       | 0.75                  | 2/3               | 4                       |
| DL-alpha-glycerol phosphate | 0.75                  | 2/3               | 4                       |
| D-Mannitol                  | 0.75                  | 2/3               | 4                       |
| 3-Methyl-2-oxobutanoic acid | 1                     | 2/2               | 4                       |
| Lactic acid                 | 1                     | 2/2               | 4                       |
| Taurine                     | 1                     | 2/2               | 4                       |
| Uracil                      | 1                     | 2/2               | 4                       |
| D-Mannose                   | 0.71                  | 3/5               | 4                       |

Matching ratio and uniqueness are outputs from COLMAR, whereas Confidence Index is our laboratory confidence scale that varies from 1-5 as follows: 1 - putatively characterized compound classes or annotated compounds, 2 – compound match to literature and external databases, 3 - COLMAR 13C-1H HSQC database matching, 4 - COLMAR 13C-1H HSQC validated by 2D 1H-1H TOCSY, 2D TOCSY and 5 - samples are spiked with known amount of a compound(s) to confirm identification.
